# Supplementary material for: Marine aerosol distributions from shipborne observations over the South China Sea: diurnal variation characteristics and their controlling factors
Source: Copernicus journal article supplement (doi:10.5194/acp-25-18227-2025), 2025-12-12
Supplement: Supplementary file 1 [file acp-25-18227-2025-supplement.pdf]

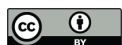

*Supplement of*

## **Marine aerosol distributions from shipborne observations over the South China Sea: diurnal variation characteristics and their controlling factors**

**Zhi Qiao et al.**

*Correspondence to:* Shengcheng Cui ([csc@aiofm.ac.cn](mailto:csc@aiofm.ac.cn))

The copyright of individual parts of the supplement might differ from the article licence.

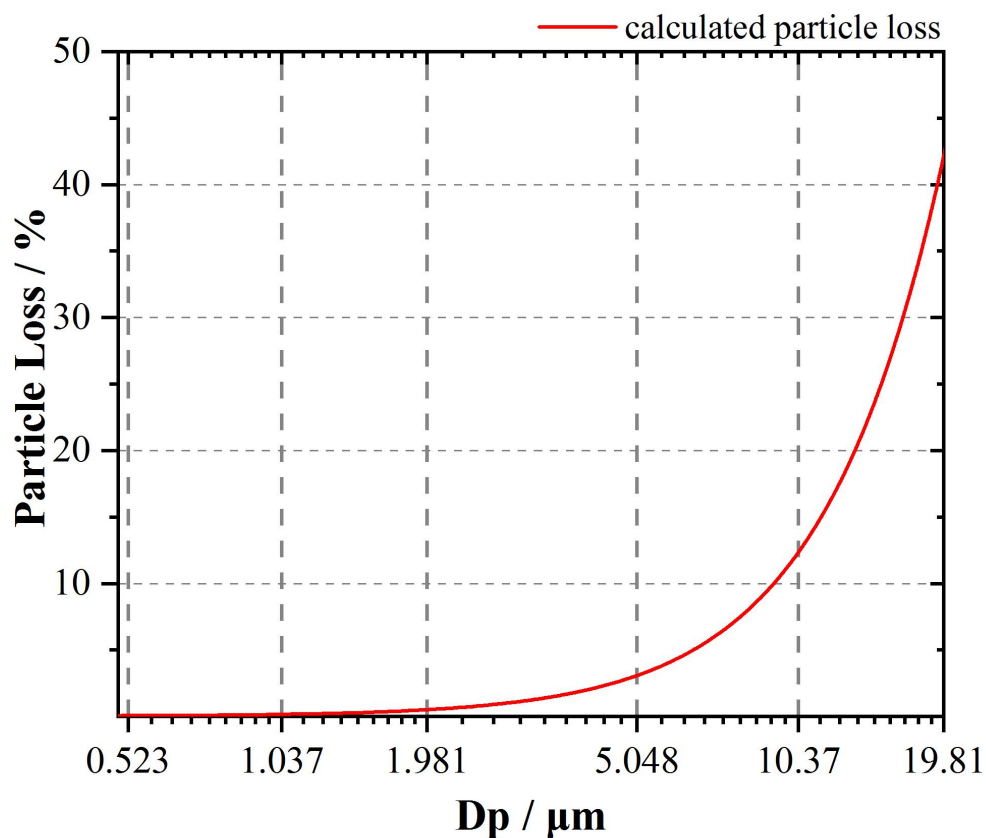

**Fig. S1** The calculated particle losses for the Model 3321 APS spectrometer in this cruise.

#### **S1. The field inter-comparison experiment description**

To verify the APS measurements, we performed a field inter-comparison experiment from 2 October to 17 October 2025 at a decommissioned wharf in Zhuhai, Guangdong Province, China (22°12' N, 113°37' E). This site is remote from industrial emissions and roads, with an unobstructed 180° view of the northern SCS, to ensure marine aerosol measurements are achievable. Three instruments were deployed side-by-side in an open environment with 10 cm long tubes. These tubes were fixed to the railing at 30° to the horizontal and faced the sea surface (to simulate the previous observation scenario and minimize terrestrial interference). The three instruments comprised: a Model 3321 APS spectrometer (TSI Incorporated, USA), which measures 0.5–20  $\mu\text{m}$ ; a Portable Optical Particle Spectrometer (POPS, Handix Scientific, USA), which measures 0.115–3.37  $\mu\text{m}$ ; and a Model 11-D Portable Aerosol Spectrometer (GRIMM, Germany), which measures 0.25–30  $\mu\text{m}$ . The aerosol data resolution was set to 10 min in this inter-comparison experiment.

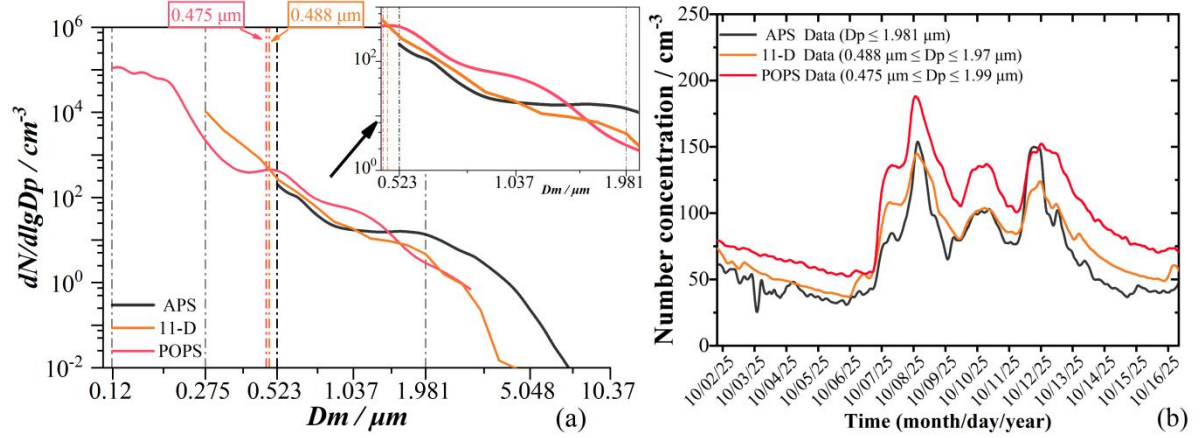

Fig. S2 (a) The NCs of average size distributions for different aerosol measurement instruments (black solid line represented the APS data, orange solid line represented the 11-D data, and red solid line represented the POPS data). (b) Trends of NCs for different aerosol measurement instruments.

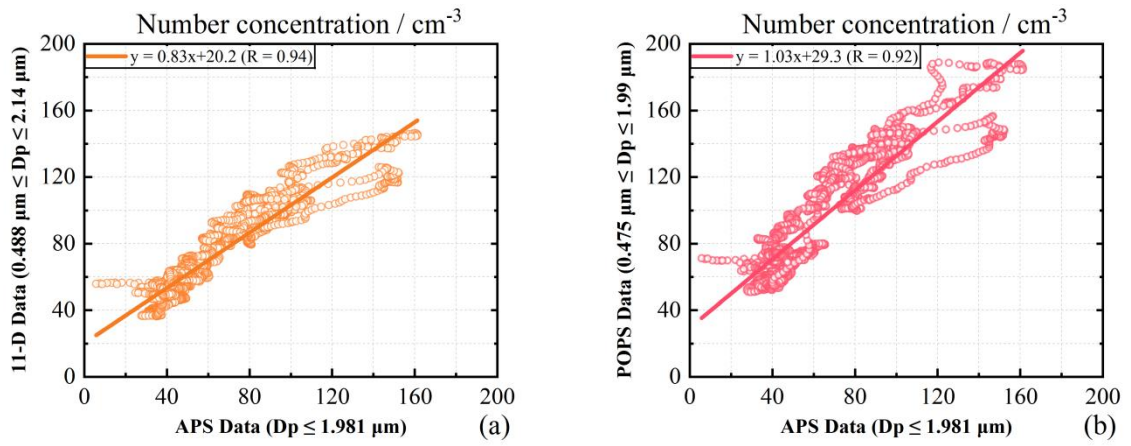

Fig. S3 The scatter plots of (a) NCs of 11-D data and APS data, (b) NCs of POPS data and APS data.

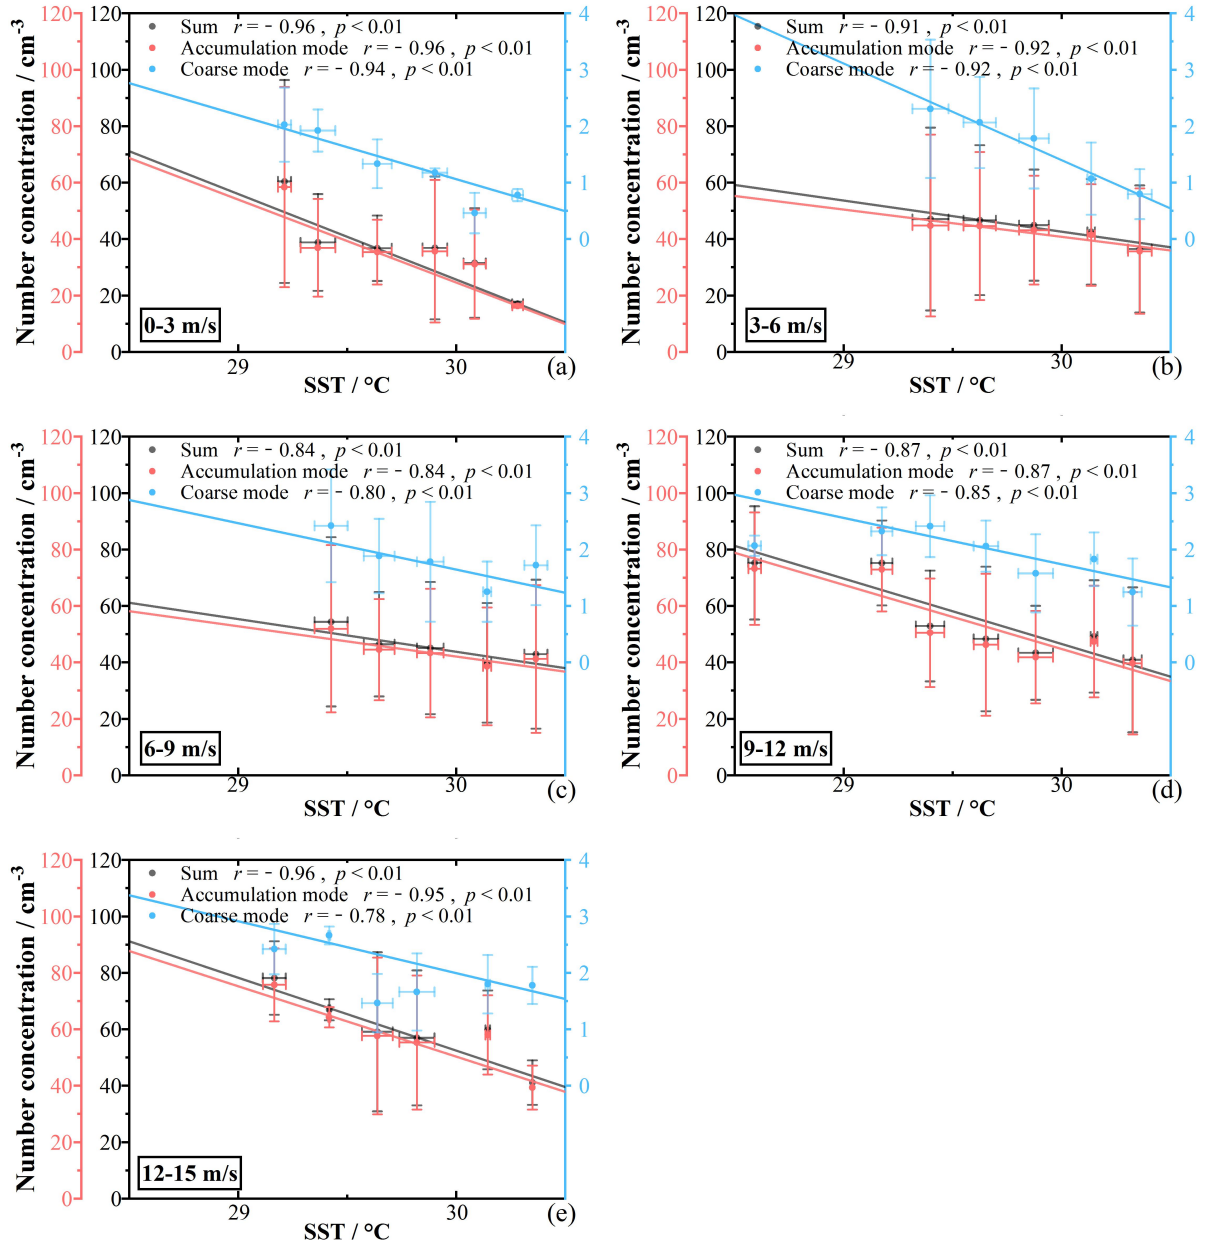

**Fig. S4** The NCs versus SST in the pelagic region. The NC of all aerosol particle modes versus SST for 0–3 m s<sup>-1</sup> (a), 3–6 m s<sup>-1</sup> (b), 6–9 m s<sup>-1</sup> (c), 9–12 m s<sup>-1</sup> (d), and 12–15 m s<sup>-1</sup> (e) WS intervals. The error bars represented the standard deviations. The  $r$  represented the Pearson correlation coefficients, and the  $p$  values were performed to test whether the correlations were significant.

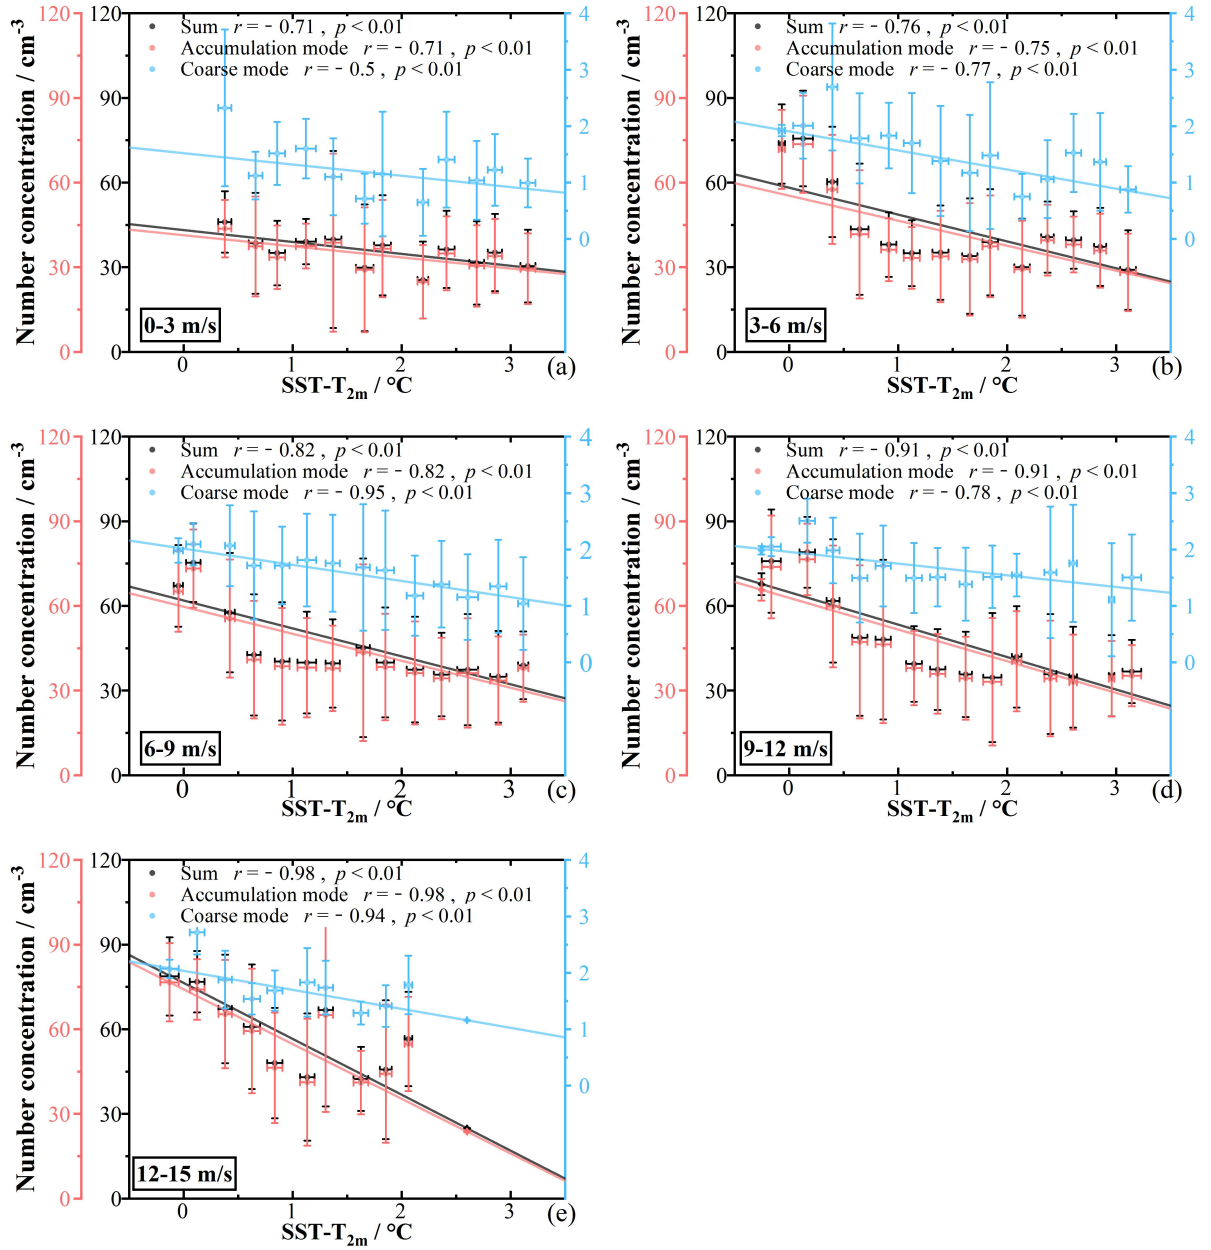

**Fig. S5** The NCs versus SST-T<sub>2m</sub> in the pelagic region. The NC of all aerosol particle modes versus SST-T<sub>2m</sub> for 0–3 m s<sup>-1</sup> (a), 3–6 m s<sup>-1</sup> (b), 6–9 m s<sup>-1</sup> (c), 9–12 m s<sup>-1</sup> (d), and 12–15 m s<sup>-1</sup> (e) WS intervals. The error bars represented the standard deviations. The  $r$  represented the Pearson correlation coefficients, and the  $p$  values were performed to test whether the correlations were significant.

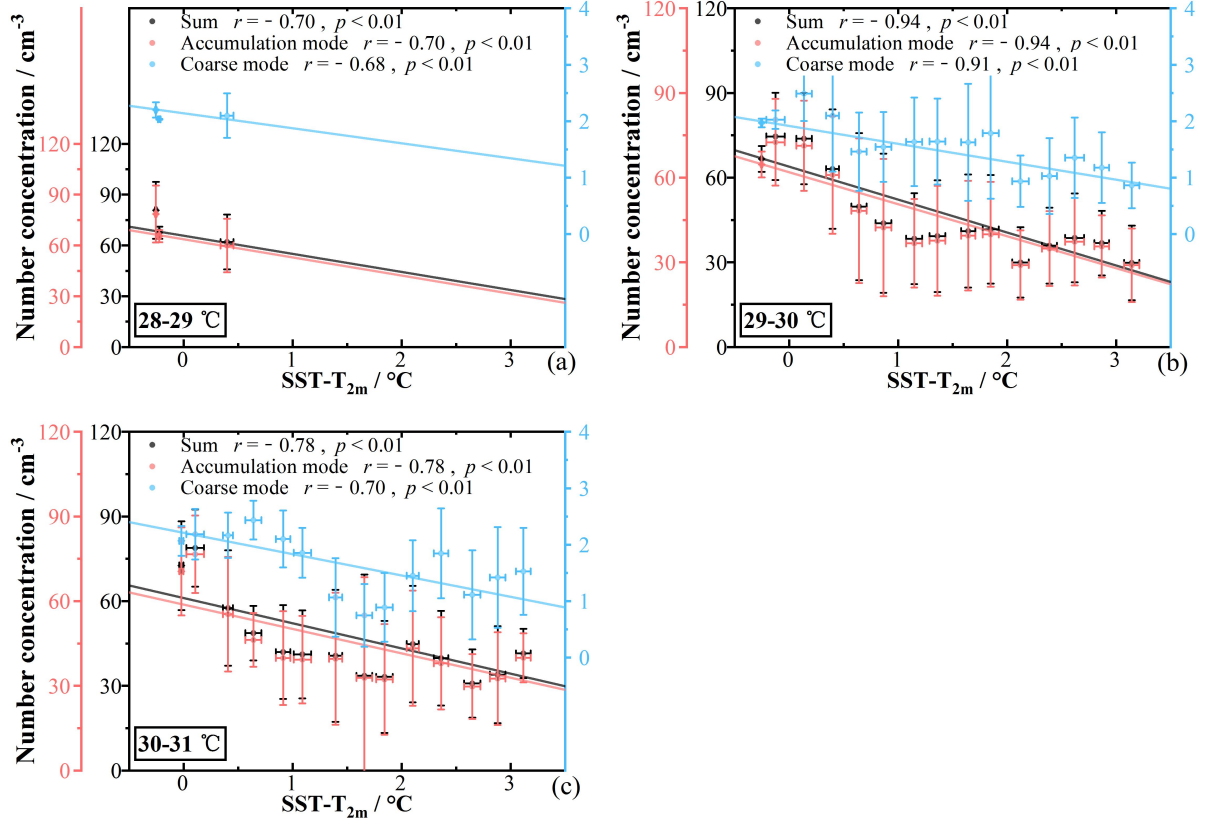

**Fig. S6** The NCs versus SST- $T_{2m}$  in the pelagic region. The NC of all aerosol particle modes versus SST- $T_{2m}$  for 28–29  $^{\circ}\text{C}$  (a), 29–30  $^{\circ}\text{C}$  (b), and 30–31  $^{\circ}\text{C}$  (c) SST intervals. The error bars represented the standard deviations. The  $r$  represented the Pearson correlation coefficients, and the  $p$  values were performed to test whether the correlations were significant.
